# Supplementary material for: Neurocognition after prenatal levetiracetam, lamotrigine, carbamazepine or valproate exposure
Source: PubMed Central journal article supplement (PMC7293688; doi:10.1007/s00415-020-09764-w), 2020-02-28
Supplement: 415_2020_9764_MOESM1_ESM.pdf [file 415_2020_9764_MOESM1_ESM.pdf]

Article: Neurocognition after prenatal levetiracetam, lamotrigine, carbamazepine or valproate exposure

Authors: Yfke Huber-Mollema, PhD<sup>1,2</sup>; Loretta van Iterson PhD<sup>1</sup>; Frans J. Oort, PhD<sup>2</sup>; Dick Lindhout, MD, PhD<sup>1,3</sup>; Roos Rodenburg, PhD<sup>1,2</sup>

<sup>1</sup>Stichting Epilepsie Instellingen Nederland (SEIN), Heemstede, The Netherlands

<sup>2</sup>Research Institute of Child Development and Education, University of Amsterdam, The Netherlands

<sup>3</sup>Department of Genetics, University Medical Center Utrecht, The Netherlands

Corresponding author: Roos Rodenburg, [H.R.Rodenburg@uva.nl](mailto:H.R.Rodenburg@uva.nl)

e-Table 1a

*Bivariate correlations between potential confounders (a - p) and cognitive outcome measures*

|                                                       | VIQ    | PIQ    | FSIQ   | PSI     |
|-------------------------------------------------------|--------|--------|--------|---------|
| a. Maternal IQ                                        | ,389** | ,257** | ,382** | ,300**  |
| b. Type of maternal epilepsy                          | -,016  | ,035   | ,010   | -,019   |
| c. Tonic-clonic seizures during pregnancy             | ,093   | ,028   | ,074   | -,045   |
| d. Use of periconceptional folic acid                 | -,013  | ,047   | ,016   | ,001    |
| e. Alcohol exposure during first trimester            | -,052  | -,047  | -,057  | -,042   |
| f. Alcohol exposure during second or third trimester  | -,065  | -,020  | -,045  | -,033   |
| g. Nicotine exposure during first trimester           | -,083  | -,087  | -,103  | ,016    |
| h. Nicotine exposure during second or third trimester | -,122  | -,121  | -,145  | -,103   |
| i. Breastfeeding                                      | -,126  | -,049  | -,109  | -,072   |
| j. Maternal age at delivery                           | -,012  | ,017   | ,002   | ,007    |
| k. Maternal education                                 | ,384** | ,294** | ,404** | ,249**  |
| l. Gestational age                                    | ,077   | ,022   | ,055   | ,094    |
| m. Gender                                             | -,041  | -,037  | -,046  | ,101    |
| n. Age at assessment                                  | -,029  | ,055   | ,018   | -,051   |
| o. Presence or absence of congenital malformations    | -,124  | -,167* | -,175* | -,344** |
| p. Time of inclusion in the EURAP-NL database         | ,055   | ,100   | ,089   | -,006   |

*Cognitive outcome measures:* VIQ = verbal intelligence, PIQ = performance intelligence, FSIQ = full scale intelligence, PSI = processing speed index.

*Potential confounders:* a. Maternal IQ measured with WAIS-III-NL; b. generalized epilepsy (yes, no, dichotomous); c. Tonic-clonic seizures during pregnancy (yes, no, dichotomous); d. Periconceptional use of folic acid (yes, no dichotomous); e. Alcohol use during first trimester ((yes, no dichotomous); f. Alcohol use during second or third trimester (yes, no dichotomous); g. Nicotine use during first trimester (yes, no dichotomous); h. Nicotine use during second or third trimester (yes, no dichotomous); i. Breastfeeding (yes, no dichotomous); j. Maternal age at delivery (years, interval); k. Maternal education: higher educated (yes/no, dichotomous); l. Gestational age (weeks, interval); m. Gender (boy, girl, dichotomous); n. Age of child at time of study (months, interval); o. Presence or absence of congenital malformations (yes, no dichotomous); p. Time of inclusion, prospective (yes, no, dichotomous).

\*  $p < .05$  \*\*  $p < .01$

e-Table 5

Multiple regression analyses of specific neurocognitive outcomes with VPA as reference group

|             | Attention and Executive functioning |                 |                |                                   |                 |                |                                        |                |                |                                       |                 |                |
|-------------|-------------------------------------|-----------------|----------------|-----------------------------------|-----------------|----------------|----------------------------------------|----------------|----------------|---------------------------------------|-----------------|----------------|
|             | Auditory Attention                  |                 |                | Response Set                      |                 |                | Statue                                 |                |                | Design Fluency                        |                 |                |
|             | B (SE)                              | 95% CI          | <i>p</i> Value | B (SE)                            | 95% CI          | <i>p</i> Value | B (SE)                                 | 95% CI         | <i>p</i> Value | B (SE)                                | 95% CI          | <i>p</i> Value |
| Constant    | 4.4 (1.6)                           | 1.3 to 7.6      | .006           | 3.1 (1.6)                         | 0.02 to 6.2     | .049           | 3.6 (2.1)                              | -0.5 to 7.7    | .082           | 2.3 (2.5)                             | -2.6 to 7.2     | .352           |
| CBZ         | 0.2 (0.7)                           | -1.2 to 1.6     | .780           | 0.5 (0.7)                         | -0.9 to 2.0     | .445           | 2.3 (0.9)                              | 0.5 to 4.2     | .016*          | 2.1 (1.1)                             | -0.1 to 4.4     | .064†          |
| LTG         | -0.4 (0.6)                          | -1.7 to 0.8     | .494           | 0.6 (0.6)                         | -0.7 to 1.8     | .385           | 2.5 (0.8)                              | 0.8 to 4.1     | .004*          | 2.0 (1.0)                             | 0.04 to 4.0     | .046*          |
| LEV         | -0.2 (0.8)                          | -1.7 to 1.3     | .826           | 0.5 (0.8)                         | -1.0 to 1.9     | .546           | 2.1 (1.0)                              | 0.1 to 4.1     | .037*          | 1.9 (1.2)                             | -0.5 to 4.2     | .115           |
| Maternal IQ | 0.05 (0.01)                         | 0.02 to 0.08    | .000**         | 0.05 (0.01)                       | 0.03 to 0.08    | .000**         | 0.03 (0.02)                            | -0.01 to 0.06  | .152           | 0.07 (0.02)                           | 0.02 to 0.1     | .003**         |
| Dose        | -0.001 (0.003)                      | -0.006 to 0.006 | .994           | -0.002 (0.003)                    | -0.008 to 0.005 | .572           | 0.003 (0.004)                          | -0.005 to 0.01 | .468           | -0.006 (0.005)                        | -0.02 to 0.004  | .262           |
| VPA Dose    | 0.01 (0.02)                         | -0.03 to 0.06   | .597           | 0.03 (0.02)                       | -0.02 to 0.07   | .264           | -0.06 (0.03)                           | -0.1 to -0.005 | .032*          | 0.006 (0.04)                          | -0.06 to 0.08   | .861           |
|             | Inhibition –<br>naming total errors |                 |                | Inhibition –<br>naming time score |                 |                | Inhibition-<br>inhibition total errors |                |                | Inhibition –<br>inhibition time score |                 |                |
|             | B (SE)                              | 95% CI          | <i>p</i> Value | B (SE)                            | 95% CI          | <i>p</i> Value | B (SE)                                 | 95% CI         | <i>p</i> Value | B (SE)                                | 95% CI          | <i>p</i> Value |
|             | Constant                            | 8.1 (1.5)       | 5.1 to 11.1    | .000                              | 5.2 (1.5)       | 2.4 to 8.1     | .000                                   | 7.0 (1.5)      | 4.0 to 10.0    | .000                                  | 6.1 (1.3)       | 3.6 to 8.6     |
| CBZ         | 0.04 (0.7)                          | -1.3 to 1.4     | .957           | 1.3 (0.7)                         | 0.03 to 2.6     | .046*          | 0.3 (0.7)                              | -1.1 to 1.6    | .707           | 0.8 (0.6)                             | -0.4 to 1.9     | .187           |
| LTG         | 0.2 (0.6)                           | -1.0 to 1.4     | .731           | 1.5 (0.6)                         | 0.4 to 2.7      | .011*          | 0.1 (0.6)                              | -1.1 to 1.4    | .815           | 0.6 (0.5)                             | -0.4 to 1.7     | .229           |
| LEV         | 0.7 (0.7)                           | -0.7 to 2.2     | .314           | 1.4 (0.7)                         | 0.01 to 2.8     | .049*          | 0.8 (0.7)                              | -0.6 to 2.3    | .250           | 0.8 (0.6)                             | -0.4 to 2.1     | .171           |
| Maternal IQ | 0.004 (0.01)                        | -0.02 to 0.03   | .745           | 0.04 (0.01)                       | 0.02 to 0.07    | .001**         | 0.01 (0.01)                            | -0.01 to 0.04  | .282           | 0.02 (0.01)                           | -0.003 to 0.04  | .082           |
| Dose        | 0.000 (0.003)                       | -0.006 to 0.006 | .962           | 0.001 (0.03)                      | -0.005 to 0.007 | .747           | 0.005 (0.003)                          | -0.001 to 0.01 | .085           | 0.004 (0.003)                         | -0.001 to 0.009 | .119           |
| VPA Dose    | 0.002 (0.02)                        | -0.04 to 0.04   | .921           | -0.02 (0.02)                      | -0.06 to 0.02   | .381           | -0.009 (0.02)                          | -0.05 to 0.03  | .667           | -0.01 (0.02)                          | -0.05 to 0.02   | .447           |

Note. VPA: valproate; CBZ; carbamazepine; LTG: lamotrigine; LEV: levetiracetam.

Dose was standardized based on the formula:  $[100 \times ((\text{dose } 1^{\text{st}} \text{ trimester} - \text{median AED dose}) / \text{median AED dose})]$ .

B = unstandardized coefficients, SE = standard error, CI = Confidence Interval.

† < .10 \**p* < 0.05 \*\* *p* < 0.01

to be continued (1 of 3)

Continued (2 of 3)

| <i>Language Skills</i>     |                              |                 |                |                           |                 |                |                              |                 |                |                          |                |                |
|----------------------------|------------------------------|-----------------|----------------|---------------------------|-----------------|----------------|------------------------------|-----------------|----------------|--------------------------|----------------|----------------|
|                            | Comprehension of Instruction |                 |                | Speeded Naming time score |                 |                | Speeded Naming total correct |                 |                | Word Generation          |                |                |
|                            | B (SE)                       | 95% CI          | <i>p</i> Value | B (SE)                    | 95% CI          | <i>p</i> Value | B (SE)                       | 95% CI          | <i>p</i> Value | B (SE)                   | 95% CI         | <i>p</i> Value |
| Constant                   | 2.2 (1.7)                    | -1.2 to 5.7     | .201           | 4.4 (1.6)                 | 1.3 to 7.5      | .005           | 4.0 (2.0)                    | -0.05 to 8.0    | .053           | 3.3 (2.0)                | -0.7 to 7.2    | .105           |
| CBZ                        | 1.7 (0.8)                    | 0.1 to 3.3      | .033*          | 1.2 (0.7)                 | -0.2 to 2.6     | .093†          | 1.8 (0.9)                    | -0.04 to 3.6    | .055†          | 1.5 (0.9)                | -0.3 to 3.3    | .109           |
| LTG                        | 2.0 (0.7)                    | 0.6 to 3.4      | .005**         | 1.1 (0.6)                 | -0.2 to 2.3     | .091†          | 1.8 (0.8)                    | 0.1 to 3.4      | .033*          | 2.1 (0.8)                | 0.5 to 3.7     | .011*          |
| LEV                        | 2.5 (0.8)                    | 0.8 to 4.1      | .004**         | 1.1 (0.8)                 | -0.4 to 2.6     | .151           | 0.7 (1.0)                    | -1.2 to 2.7     | .444           | 1.7 (1.0)                | -0.2 to 3.6    | .074†          |
| Maternal IQ                | 0.07 (0.02)                  | 0.04 to 0.1     | .000**         | 0.04 (0.01)               | 0.008 to 0.06   | .012*          | 0.03 (0.02)                  | -0.007 to 0.06  | .110           | 0.05 (0.02)              | 0.02 to 0.09   | .004**         |
| Dose                       | -0.002 (0.004)               | -0.009 to 0.005 | .601           | 0.001 (0.003)             | -0.005 to 0.008 | .729           | -0.002 (0.004)               | -0.01 to 0.007  | .693           | 0.002 (0.004)            | -0.006 to 0.01 | .605           |
| VPA Dose                   | -0.02 (0.02)                 | -0.06 to 0.03   | .531           | -0.02 (0.02)              | -0.06 to 0.03   | .432           | -0.04 (0.03)                 | -0.09 to 0.02   | .184           | -0.04 (0.03)             | -0.09 to 0.02  | .202           |
|                            | Verbal Fluency               |                 |                | Vocabulary WBQ            |                 |                | Auditory Synthesis           |                 |                | Phoneme Deletion         |                |                |
|                            | B (SE)                       | 95% CI          | <i>p</i> Value | B (SE)                    | 95% CI          | <i>p</i> Value | B (SE)                       | 95% CI          | <i>p</i> Value | B (SE)                   | 95% CI         | <i>p</i> Value |
| Constant                   | 3.3 (2.8)                    | -2.2 to 8.8     | .241           | 77.6 (7.4)                | 63.0 to 92.1    | .000           | 6.1 (1.8)                    | 2.6 to 9.6      | .001           | 1.9 (3.1)                | -4.4 to 8.2    | .549           |
| CBZ                        | -0.7 (1.3)                   | -3.2 to 1.8     | .577           | 5.7 (3.4)                 | -1.0 to 12.3    | .094†          | -0.2 (0.8)                   | -1.9 to 1.4     | .763           | 1.8 (1.4)                | -1.1 to 4.7    | .207           |
| LTG                        | 1.7 (1.1)                    | -0.5 to 4.0     | .125           | 5.2 (3.0)                 | -0.7 to 11.2    | .082†          | -0.1 (0.7)                   | -1.6 to 1.3     | .866           | 1.7 (1.3)                | -0.8 to 4.3    | .183           |
| LEV                        | 0.6 (1.3)                    | -2.1 to 3.2     | .671           | 8.1 (3.5)                 | 1.1 to 15.1     | .023*          | 1.2 (0.8)                    | -0.5 to 2.9     | .175           | 0.9 (1.5)                | -2.1 to 3.9    | .545           |
| Maternal IQ                | 0.06 (0.03)                  | 0.01 to 0.1     | .017*          | 0.3 (0.07)                | 0.1 to 0.4      | .000**         | 0.01 (0.02)                  | -0.02 to 0.04   | .523           | 0.07 (0.03)              | 0.009 to 0.1   | .024*          |
| Dose                       | -0.004 (0.006)               | -0.02 to 0.007  | .447           | 0.005 (0.02)              | -0.03 to 0.04   | .750           | 0.005 (0.004)                | -0.002 to 0.01  | .156           | 0.007 (0.006)            | -0.006 to 0.02 | .259           |
| VPA Dose                   | -0.02 (0.04)                 | -0.1 to 0.06    | .595           | -0.09 (0.1)               | -0.3 to 0.1     | .371           | -0.03 (0.03)                 | -0.08 to 0.02   | .309           | -0.1 (0.04)              | -0.2 to -0.02  | .017*          |
| <i>Memory and Learning</i> |                              |                 |                |                           |                 |                |                              |                 |                |                          |                |                |
|                            | Memory for Faces             |                 |                | Memory for Faces Delayed  |                 |                | Memory for Names             |                 |                | Memory for Names Delayed |                |                |
|                            | B (SE)                       | 95% CI          | <i>p</i> Value | B (SE)                    | 95% CI          | <i>p</i> Value | B (SE)                       | 95% CI          | <i>p</i> Value | B (SE)                   | 95% CI         | <i>p</i> Value |
| Constant                   | 5.1 (2.0)                    | 1.2 to 9.0      | .010           | 6.2 (1.9)                 | 2.4 to 9.9      | .001           | 5.6 (1.7)                    | 2.1 to 9.0      | .002           | 4.8 (2.4)                | 0.002 to 9.6   | .050           |
| CBZ                        | 2.2 (0.9)                    | 0.4 to 4.0      | .015*          | 2.0 (0.9)                 | 0.3 to 3.7      | .022*          | 0.4 (0.8)                    | -1.2 to 2.0     | .597           | 1.2 (1.1)                | -1.0 to 3.4    | .268           |
| LTG                        | 1.2 (0.8)                    | -0.4 to 2.7     | .150           | 0.9 (0.8)                 | -0.6 to 2.4     | .257           | 0.6 (0.7)                    | -0.8 to 2.0     | .417           | 1.3 (1.0)                | -0.6 to 3.2    | .187           |
| LEV                        | 0.4 (0.9)                    | -1.4 to 2.3     | .645           | 1.2 (0.9)                 | -0.6 to 3.0     | .188           | 1.3 (0.8)                    | -0.3 to 3.0     | .112           | 1.8 (1.2)                | -0.5 to 4.1    | .122           |
| Maternal IQ                | 0.04 (0.02)                  | 0.005 to 0.07   | .024*          | 0.04 (0.02)               | 0.006 to 0.07   | .022*          | 0.03 (0.02)                  | -0.004 to 0.06  | .085           | 0.02 (0.02)              | -0.02 to 0.06  | .316           |
| Dose                       | 0.004 (0.004)                | -0.004 to 0.01  | .345           | 0.002 (0.004)             | -0.005 to 0.01  | .547           | 0.00005 (0.004)              | -0.007 to 0.007 | .998           | -0.007 (0.005)           | -0.02 to 0.003 | .171           |
| VPA Dose                   | -0.007 (0.03)                | -0.06 to 0.05   | .801           | -0.05 (0.03)              | -0.1 to 0.004   | .069           | -0.05 (0.02)                 | -0.1 to -0.005  | .032*          | -0.08 (0.03)             | -0.1 to -0.008 | .029*          |

Continued (3 of 3)

|                     | Narrative Memory                              |                 |                | Imitating Hand Positions                          |                 |                | Fine Motor Skills<br>Visuomotor Precision<br>time score |                 |                | Visuomotor Precision<br>total errors          |                 |                |
|---------------------|-----------------------------------------------|-----------------|----------------|---------------------------------------------------|-----------------|----------------|---------------------------------------------------------|-----------------|----------------|-----------------------------------------------|-----------------|----------------|
|                     | B (SE)                                        | 95% CI          | <i>p</i> Value | B (SE)                                            | 95% CI          | <i>p</i> Value | B (SE)                                                  | 95% CI          | <i>p</i> Value | B (SE)                                        | 95% CI          | <i>p</i> Value |
| Constant            | 5.5 (1.4)                                     | 2.6 to 8.3      | .000           | 9.7 (1.8)                                         | 6.2 to 13.3     | .000           | 9.9 (1.7)                                               | 6.6 to 13.2     | .000           | 3.9 (1.5)                                     | 0.9 to 6.9      | .010           |
| CBZ                 | 0.4 (0.7)                                     | -0.9 to 1.7     | .511           | 0.4 (0.8)                                         | -1.2 to 2.0     | .635           | -1.1 (0.8)                                              | -2.6 to 0.4     | .158           | 2.0 (0.7)                                     | 0.6 to 3.4      | .004**         |
| LTG                 | 0.6 (0.6)                                     | -0.5 to 1.8     | .274           | 0.2 (0.7)                                         | -1.3 to 1.6     | .802           | -0.9 (0.7)                                              | -2.2 to 0.5     | .194           | 2.3 (0.6)                                     | 1.1 to 3.5      | .000**         |
| LEV                 | 0.6 (0.7)                                     | -0.7 to 2.0     | .363           | 0.6 (0.9)                                         | -1.1 to 2.3     | .491           | -0.1 (0.8)                                              | -1.7 to 1.4     | .877           | 0.9 (0.7)                                     | -0.5 to 2.4     | .197           |
| Maternal IQ         | 0.03 (0.01)                                   | 0.007 to 0.06   | .014*          | 0.01 (0.02)                                       | -0.02 to 0.04   | .499           | -0.009 (0.02)                                           | -0.04 to 0.02   | .529           | 0.03 (0.01)                                   | -0.002 to 0.05  | .066           |
| Dose                | -0.001 (0.003)                                | -0.007 to 0.005 | .797           | 0.001 (0.004)                                     | -0.007 to 0.008 | .851           | -0.001 (0.003)                                          | -0.008 to 0.005 | .670           | -0.005 (0.003)                                | -0.01 to 0.001  | .092           |
| VPA Dose            | -0.05 (0.02)                                  | -0.09 to -0.006 | .025*          | 0.02 (0.03)                                       | -0.03 to 0.07   | .366           | -0.004 (0.02)                                           | -0.05 to 0.04   | .847           | -0.003 (0.002)                                | -0.05 to 0.04   | .877           |
|                     | Fingertip Tapping<br>repetition dominant hand |                 |                | Fingertip Tapping<br>repetition non-dominant hand |                 |                | Fingertip Tapping<br>series dominant hand               |                 |                | Fingertip Tapping<br>series non-dominant hand |                 |                |
|                     | B (SE)                                        | 95% CI          | <i>p</i> Value | B (SE)                                            | 95% CI          | <i>p</i> Value | B (SE)                                                  | 95% CI          | <i>p</i> Value | B (SE)                                        | 95% CI          | <i>p</i> Value |
| Constant            | 10.3 (1.1)                                    | 8.1 to 12.5     | .000           | 12.3 (1.1)                                        | 10.2 to 14.4    | .000           | 9.5 (1.5)                                               | 6.6 to 12.3     | .000           | 10.3 (1.6)                                    | 7.1 to 13.5     | .000           |
| CBZ                 | 0.5 (0.5)                                     | -0.5 to 1.5     | .317           | -0.09 (0.5)                                       | -1.0 to 0.9     | .847           | 1.1 (0.7)                                               | -0.2 to 2.4     | .111           | 1.0 (0.7)                                     | -0.5 to 2.5     | .180           |
| LTG                 | -0.06 (0.5)                                   | -1.0 to 0.8     | .892           | -0.2 (0.4)                                        | -1.0 to 0.6     | .641           | 1.2 (0.6)                                               | 0.02 to 2.4     | .047*          | 0.8 (0.7)                                     | -0.5 to 2.1     | .244           |
| LEV                 | 0.1 (0.5)                                     | -1.0 to 1.2     | .854           | 0.09 (0.5)                                        | -0.9 to 1.1     | .859           | 1.3 (0.7)                                               | -0.1 to 2.6     | .076†          | 0.9 (0.8)                                     | -0.6 to 2.4     | .254           |
| Maternal IQ         | 0.02 (0.01)                                   | -0.003 to 0.04  | .102           | -0.005 (0.009)                                    | -0.02 to 0.01   | .580           | -0.001 (0.01)                                           | -0.03 to 0.03   | .956           | -0.02 (0.01)                                  | -0.04 to 0.01   | .265           |
| Dose                | -0.002 (0.002)                                | -0.006 to 0.003 | .516           | -0.002 (0.002)                                    | -0.006 to 0.003 | .416           | 0.002 (0.003)                                           | -0.004 to 0.008 | .524           | -0.002 (0.003)                                | -0.008 to 0.005 | .621           |
| VPA Dose            | 0.002 (0.02)                                  | -0.03 to 0.03   | .887           | 0.007 (0.02)                                      | -0.02 to 0.04   | .620           | 0.04 (0.02)                                             | -0.003 to 0.08  | .072           | 0.02 (0.02)                                   | -0.03 to 0.06   | .416           |
| Visuospatial Skills |                                               |                 |                |                                                   |                 |                |                                                         |                 |                |                                               |                 |                |
|                     | Arrows                                        |                 |                | Design Copying                                    |                 |                | Visual Attention                                        |                 |                |                                               |                 |                |
|                     | B (SE)                                        | 95% CI          | <i>p</i> Value | B (SE)                                            | 95% CI          | <i>p</i> Value | B (SE)                                                  | 95% CI          | <i>p</i> Value |                                               |                 |                |
| Constant            | 4.3 (2.0)                                     | 0.3 to 8.3      | .033           | 5.3 (1.3)                                         | 2.7 to 7.9      | .000           | 9.9 (2.4)                                               | 5.2 to 14.6     | .000           |                                               |                 |                |
| CBZ                 | 1.6 (0.9)                                     | -0.3 to 3.4     | .093†          | 1.3 (0.6)                                         | 0.1 to 2.5      | .033*          | 0.8 (1.0)                                               | -1.3 to 3.0     | .434           |                                               |                 |                |
| LTG                 | 1.7 (0.8)                                     | 0.1 to 3.3      | .036*          | 1.1 (0.5)                                         | 0.07 to 2.2     | .037*          | 0.4 (1.0)                                               | -1.5 to 2.4     | .641           |                                               |                 |                |
| LEV                 | 1.2 (1.0)                                     | -0.7 to 3.1     | .226           | 0.7 (0.6)                                         | -0.6 to 1.9     | .289           | -0.5 (1.1)                                              | -2.8 to 1.7     | .633           |                                               |                 |                |
| Maternal IQ         | 0.06 (0.02)                                   | 0.03 to 0.1     | .000**         | 0.03 (0.01)                                       | 0.005 to 0.05   | .017*          | 0.009 (0.02)                                            | -0.03 to 0.05   | .659           |                                               |                 |                |
| Dose                | -0.005 (0.004)                                | 0.03 to 0.1     | .253           | -0.003 (0.003)                                    | -0.009 to 0.002 | .238           | -0.001 (0.005)                                          | -0.01 to 0.009  | .856           |                                               |                 |                |
| VPA Dose            | -0.01 (0.03)                                  | -0.07 to 0.04   | .644           | -0.01 (0.02)                                      | -0.05 to 0.02   | .493           | -0.02 (0.03)                                            | -0.09 to 0.04   | .486           |                                               |                 |                |

e-Table 6

Multiple regression analyses with LTG as reference group

|             | Intelligence                        |                 |             |                                |                |            |                                     |                |            |                                    |                 |            |
|-------------|-------------------------------------|-----------------|-------------|--------------------------------|----------------|------------|-------------------------------------|----------------|------------|------------------------------------|-----------------|------------|
|             | Verbal IQ                           |                 |             | Performance IQ                 |                |            | Full Scale IQ                       |                |            | Processing Speed Index             |                 |            |
|             | B (SE)                              | 95% CI          | p Value     | B (SE)                         | 95% CI         | p Value    | B (SE)                              | 95% CI         | p Value    | B (SE)                             | 95% CI          | p Value    |
| Constant    | 67.0 (8.3)                          | 50.7 to 83.4    | .000        | 78.3 (8.9)                     | 60.7 to 96.0   | .000       | 68.8 (8.2)                          | 52.6 to 85.0   | .000       | 76.5 (8.6)                         | 59.6 to 93.5    | .000       |
| VPA         | -8.5 (3.4)                          | -15.3 to -1.8   | .014        | -1.0 (3.7)                     | -8.4 to 6.3    | .778       | -5.8 (3.4)                          | -12.5 to 1.0   | .093       | -3.7 (3.6)                         | -10.7 to 3.4    | .306       |
| CBZ         | -0.7 (3.0)                          | -6.7 to 5.3     | .809        | -2.3 (3.3)                     | -8.8 to 4.2    | .481       | -1.7 (3.0)                          | -7.7 to 4.2    | .564       | 1.0 (3.2)                          | -5.3 to 7.2     | .761       |
| LEV         | 3.7 (3.3)                           | -2.8 to 10.2    | .265        | -3.0 (3.6)                     | -10.0 to 4.0   | .402       | 0.5 (3.3)                           | -6.0 to 6.9    | .882       | 0.9 (3.4)                          | -5.8 to 7.7     | .789       |
| Maternal IQ | 0.4 (0.1)                           | 0.2 to 0.6      | .000        | 0.3 (0.1)                      | 0.1 to 0.4     | .002       | 0.4 (0.1)                           | 0.2 to 0.5     | .000       | 0.3 (0.1)                          | 0.2 to 0.5      | .000       |
| Dose        | -0.02 (0.03)                        | -0.1 to 0.04    | .535        | 0.001 (0.03)                   | -0.1 to 0.1    | .975       | -0.01 (0.03)                        | -0.1 to 0.1    | .729       | -0.1 (0.03)                        | -0.2 to -0.04   | .002       |
| LTG Dose    | 0.04 (0.04)                         | -0.04 to 0.1    | .297        | -0.01 (0.04)                   | -0.1 to 0.1    | .782       | 0.02 (0.04)                         | -0.1 to 0.1    | .627       | 0.1 (0.04)                         | 0.04 to 0.2     | .003       |
|             | Attention and Executive functioning |                 |             |                                |                |            |                                     |                |            |                                    |                 |            |
|             | Auditory Attention                  |                 |             | Response Set                   |                |            | Statue                              |                |            | Design Fluency                     |                 |            |
|             | B (SE)                              | 95% CI          | p Value     | B (SE)                         | 95% CI         | p Value    | B (SE)                              | 95% CI         | p Value    | B (SE)                             | 95% CI          | p Value    |
| Constant    | 4.0 (1.5)                           | 1.0 to 6.9      | .009        | 3.2 (1.5)                      | 0.3 to 6.1     | .032       | 6.7 (2.0)                           | 2.7 to 10.6    | .001       | 3.9 (2.3)                          | -0.7 to 8.6     | .095       |
| VPA         | 0.3 (0.6)                           | -0.9 to 1.5     | .624        | -0.7 (0.6)                     | -1.9 to 0.5    | .224       | -2.1 (0.8)                          | -3.7 to -0.4   | .014       | -2.0 (1.0)                         | -3.9 to -0.1    | .041       |
| CBZ         | 0.6 (0.5)                           | -0.4 to 1.7     | .242        | 0.2 (0.5)                      | -0.8 to 1.3    | .649       | -0.3 (0.7)                          | -1.7 to 1.2    | .708       | 0.3 (0.9)                          | -1.4 to 2.0     | .741       |
| LEV         | 0.3 (0.6)                           | -0.9 to 1.5     | .643        | 0.1 (0.6)                      | -1.0 to 1.3    | .802       | -0.5 (0.8)                          | -2.0 to 1.1    | .560       | 0.04 (0.9)                         | -1.8 to 1.9     | .963       |
| Maternal IQ | 0.1 (0.01)                          | 0.03 to 0.08    | .000        | 0.1 (0.01)                     | 0.03 to 0.08   | .000       | 0.02 (0.02)                         | -0.02 to 0.06  | .239       | 0.07 (0.02)                        | 0.03 to 0.1     | .002       |
| Dose        | -0.002 (0.006)                      | -0.01 to 0.009  | .722        | -0.01 (0.006)                  | -0.02 to 0.001 | .075       | 0.004 (0.008)                       | -0.01 to 0.02  | .602       | -0.009 (0.009)                     | -0.03 to 0.009  | .314       |
| LTG Dose    | 0.001 (0.007)                       | -0.01 to 0.02   | .832        | 0.01 (0.007)                   | -0.001 to 0.03 | .060       | -0.004 (0.009)                      | -0.02 to 0.02  | .696       | 0.008 (0.01)                       | -0.01 to 0.03   | .480       |
|             | Inhibition – naming total errors    |                 |             | Inhibition – naming time score |                |            | Inhibition- inhibition total errors |                |            | Inhibition – inhibition time score |                 |            |
|             | B (SE)                              | 95% CI          | p Value     | B (SE)                         | 95% CI         | p Value    | B (SE)                              | 95% CI         | p Value    | B (SE)                             | 95% CI          | p Value    |
|             | Constant                            | 7.8 (1.4)       | 5.0 to 10.6 | .000                           | 6.6 (1.4)      | 3.9 to 9.3 | .000                                | 6.9 (1.4)      | 4.1 to 9.7 | .000                               | 6.7 (1.2)       | 4.4 to 9.1 |
| VPA         | -0.1 (0.6)                          | -1.3 to 1.1     | .872        | -1.4 (0.6)                     | -2.5 to -0.3   | .015       | -0.01 (0.6)                         | -1.2 to 1.1    | .986       | -0.5 (0.5)                         | -1.5 to 0.4     | .275       |
| CBZ         | 0.2 (0.5)                           | -0.8 to 1.2     | .697        | 0.03 (0.5)                     | -1.0 to 1.0    | .959       | 0.4 (0.5)                           | -0.6 to 1.4    | .465       | 0.2 (0.4)                          | -0.7 to 1.1     | .625       |
| LEV         | 0.9 (0.6)                           | -0.2 to 2.0     | .105        | 0.1 (0.5)                      | -1.0 to 1.2    | .863       | 1.0 (0.6)                           | -0.1 to 2.1    | .083       | 0.3 (0.5)                          | -0.6 to 1.3     | .530       |
| Maternal IQ | 0.007 (0.01)                        | -0.02 to 0.03   | .600        | 0.05 (0.01)                    | 0.02 to 0.07   | .001       | 0.02 (0.01)                         | -0.01 to 0.04  | .251       | 0.02 (0.01)                        | -0.003 to 0.04  | .091       |
| Dose        | -0.01 (0.005)                       | -0.02 to -0.002 | .023        | -0.009 (0.005)                 | -0.02 to 0.001 | .092       | -0.005 (0.005)                      | -0.02 to 0.005 | .321       | 0.0 (0.005)                        | -0.009 to 0.009 | .923       |
| LTG Dose    | 0.02 (0.007)                        | 0.006 to 0.03   | .004        | 0.01 (0.006)                   | 0.001 to 0.03  | .039       | 0.02 (0.007)                        | 0.003 to 0.03  | .019       | 0.006 (0.006)                      | -0.005 to 0.02  | .294       |

Note. VPA: valproate; CBZ; carbamazepine; LTG: lamotrigine; LEV: levetiracetam.

Dose was standardized based on the formula:  $[100 \times ((\text{dose } 1^{\text{st}} \text{ trimester} - \text{median AED dose}) / \text{median AED dose})]$ .

B = unstandardized coefficients, SE = standard error, CI = Confidence Interval.

† &lt; .10 \*p &lt; 0.05 \*\* p &lt; 0.01

to be continued (1 of 3)

Continued (2 of 3)

| <i>Language Skills</i>       |                |                |                           |                |                |                              |                |                |                          |                |                |                |
|------------------------------|----------------|----------------|---------------------------|----------------|----------------|------------------------------|----------------|----------------|--------------------------|----------------|----------------|----------------|
| Comprehension of Instruction |                |                | Speeded Naming time score |                |                | Speeded Naming total correct |                |                | Word Generation          |                |                |                |
|                              | B (SE)         | 95% CI         | <i>p</i> Value            | B (SE)         | 95% CI         | <i>p</i> Value               | B (SE)         | 95% CI         | <i>p</i> Value           | B (SE)         | 95% CI         | <i>p</i> Value |
| Constant                     | 4.1            | 0.9 to 7.4     | .013                      | 5.4 (1.5)      | 2.5 to 8.3     | .000                         | 5.8 (1.9)      | 2.0 to 9.7     | .003                     | 5.4 (1.9)      | 1.6 to 9.1     | .005           |
| VPA                          | -2.0 (0.7)     | -3.3 to -0.6   | .005                      | -0.9 (0.6)     | -2.1 to 0.3    | .130                         | -1.5 (0.8)     | -3.1 to 0.1    | .066                     | -1.9 (0.8)     | -3.4 to -0.3   | .019           |
| CBZ                          | -0.2 (0.6)     | -1.4 to 1.0    | .773                      | 0.3 (0.5)      | -0.8 to 1.4    | .559                         | 0.1 (0.7)      | -1.3 to 1.5    | .914                     | -0.5 (0.7)     | -1.8 to 0.9    | .511           |
| LEV                          | 0.6 (0.7)      | -0.7 to 1.9    | .373                      | 0.2 (0.6)      | -1.0 to 1.4    | .726                         | -1.0 (0.8)     | -2.5 to 0.6    | .219                     | -0.2 (0.8)     | -1.7 to 1.3    | .819           |
| Maternal IQ                  | 0.07 (0.02)    | 0.04 to 0.1    | .000                      | 0.04 (0.01)    | 0.008 to 0.1   | .010                         | 0.03 (0.02)    | -0.008 to 0.06 | .127                     | 0.05 (0.02)    | 0.02 to 0.1    | .005           |
| Dose                         | -0.008 (0.006) | -0.02 to 0.004 | .211                      | -0.006 (0.006) | -0.02 to 0.01  | .249                         | -0.005 (0.007) | -0.02 to 0.01  | .514                     | -0.008 (0.007) | -0.02 to 0.006 | .270           |
| LTG Dose                     | 0.008 (0.008)  | -0.007 to 0.02 | .269                      | 0.01 (0.007)   | -0.002 to 0.03 | .106                         | 0.004 (0.009)  | -0.01 to 0.02  | .634                     | 0.01 (0.009)   | -0.005 to 0.03 | .154           |
| Verbal Fluency               |                |                | Vocabulary WBQ            |                |                | Auditory Synthesis           |                |                | Phoneme Deletion         |                |                |                |
|                              | B (SE)         | 95% CI         | <i>p</i> Value            | B (SE)         | 95% CI         | <i>p</i> Value               | B (SE)         | 95% CI         | <i>p</i> Value           | B (SE)         | 95% CI         | <i>p</i> Value |
| Constant                     | 4.9 (2.6)      | -0.3 to 10.1   | .063                      | 84.8 (7.0)     | 71.0 to 98.6   | .000                         | 6.3 (1.7)      | 2.9 to 9.6     | .000                     | 4.3 (3.2)      | -2.2 to 10.7   | .187           |
| VPA                          | -1.6 (1.1)     | -3.7 to 0.6    | .154                      | -5.4 (2.9)     | -11.2 to 0.3   | .061                         | 0.2 (0.7)      | -1.2 to 1.6    | .832                     | -0.9 (1.3)     | -3.5 to 1.8    | .506           |
| CBZ                          | -2.3 (1.0)     | -4.2 to -0.4   | .017                      | -0.6 (2.6)     | -5.6 to 4.5    | .823                         | -0.2 (0.6)     | -1.4 to 1.1    | .788                     | 0.1 (1.2)      | -2.2 to 2.5    | .906           |
| LEV                          | -1.0 (1.0)     | -3.1 to 1.0    | .324                      | 1.9 (2.8)      | -3.6 to 7.4    | .490                         | 1.3 (0.7)      | -0.1 to 2.6    | .065                     | -0.7 (1.3)     | -3.3 to 1.8    | .578           |
| Maternal IQ                  | 0.1 (0.02)     | 0.01 to 0.1    | .016                      | 0.3 (0.1)      | 0.1 to 0.4     | .000                         | 0.01 (0.02)    | -0.02 to 0.04  | .613                     | 0.1 (0.03)     | -0.001 to 0.1  | .054           |
| Dose                         | -0.01 (0.01)   | -0.03 to 0.01  | .239                      | 0.02 (0.03)    | -0.03 to 0.1   | .502                         | 0.004 (0.01)   | -0.01 to 0.02  | .502                     | -0.001 (0.01)  | -0.03 to 0.02  | .960           |
| LTG Dose                     | 0.01 (0.010)   | -0.02 to 0.03  | .492                      | -0.03 (0.03)   | -0.1 to 0.03   | .300                         | 0.0 (0.01)     | -0.02 to 0.02  | .955                     | 0.01 (0.02)    | -0.02 to 0.04  | .590           |
| <i>Memory and Learning</i>   |                |                |                           |                |                |                              |                |                |                          |                |                |                |
| Memory for Faces             |                |                | Memory for Faces Delayed  |                |                | Memory for Names             |                |                | Memory for Names Delayed |                |                |                |
|                              | B (SE)         | 95% CI         | <i>p</i> Value            | B (SE)         | 95% CI         | <i>p</i> Value               | B (SE)         | 95% CI         | <i>p</i> Value           | B (SE)         | 95% CI         | <i>p</i> Value |
| Constant                     | 6.1 (1.9)      | 2.5 to 9.8     | .001                      | 7.5 (1.8)      | 3.9 to 11.1    | .000                         | 6.1 (1.6)      | 2.8 to 9.3     | .000                     | 6.2 (2.3)      | 1.6 to 10.8    | .008           |
| VPA                          | -1.1 (0.8)     | -2.6 to 0.4    | .144                      | -0.6 (0.8)     | -2.1 to 0.9    | .410                         | -0.1 (0.7)     | -1.4 to 1.3    | .917                     | -0.7 (1.0)     | -2.6 to 1.2    | .490           |
| CBZ                          | 1.3 (0.7)      | -0.1 to 2.6    | .068                      | 1.0 (0.7)      | -0.3 to 2.4    | .118                         | 0.1 (0.6)      | -1.1 to 1.3    | .850                     | 0.1 (0.9)      | -1.6 to 1.8    | .906           |
| LEV                          | -0.5 (0.7)     | -2.0 to 0.9    | .486                      | 0.3 (0.7)      | -1.2 to 1.7    | .703                         | 1.1 (0.7)      | -0.2 to 2.4    | .105                     | 0.7 (0.9)      | -1.1 to 2.5    | .439           |
| Maternal IQ                  | 0.04 (0.02)    | 0.006 to 0.1   | .021                      | 0.04 (0.02)    | 0.002 to 0.1   | .036                         | 0.03 (0.02)    | -0.005 to 0.1  | .096                     | 0.02 (0.02)    | -0.02 to 0.1   | .365           |
| Dose                         | -0.006 (0.007) | -0.02 to 0.008 | .416                      | -0.001 (0.007) | -0.01 to 0.01  | .882                         | -0.01 (0.006)  | -0.03 to 0.0   | .047                     | -0.02 (0.009)  | -0.03 to 0.001 | .061           |
| LTG Dose                     | 0.01 (0.009)   | -0.004 to 0.03 | .142                      | 0.001 (0.008)  | -0.02 to 0.02  | .905                         | 0.02 (0.008)   | 0.002 to 0.03  | .030                     | 0.01 (0.01)    | -0.009 to 0.03 | .275           |

Continued (3 of 3)

|                     | Narrative Memory                              |                |         | Imitating Hand Positions                          |                |         | Fine Motor Skills<br>Visuomotor Precision<br>time score |               |         | Visuomotor Precision<br>total errors          |                |         |
|---------------------|-----------------------------------------------|----------------|---------|---------------------------------------------------|----------------|---------|---------------------------------------------------------|---------------|---------|-----------------------------------------------|----------------|---------|
|                     | B (SE)                                        | 95% CI         | p Value | B (SE)                                            | 95% CI         | p Value | B (SE)                                                  | 95% CI        | p Value | B (SE)                                        | 95% CI         | p Value |
| Constant            | 6.2 (1.4)                                     | 3.4 to 8.9     | .000    | 9.5 (1.7)                                         | 6.2 to 12.9    | .000    | 9.1 (1.6)                                               | 6.0 to 12.1   | .000    | 6.1 (1.4)                                     | 3.3 to 9.0     | .000    |
| VPA                 | -0.2 (0.6)                                    | -1.4 (0.9)     | .688    | -0.3 (0.7)                                        | -1.7 to 1.1    | .639    | 1.0 (0.6)                                               | -0.3 to 2.2   | .142    | -2.3 (0.6)                                    | -3.5 to -1.2   | .000    |
| CBZ                 | -0.1 (0.5)                                    | -1.1 to 0.9    | .894    | 0.4 (0.6)                                         | -0.8 to 1.6    | .510    | -0.2 (0.6)                                              | -1.3 to 0.9   | .711    | -0.2 (0.5)                                    | -1.3 to 0.8    | .635    |
| LEV                 | 0.2 (0.6)                                     | -0.9 to 1.2    | .775    | 0.6 (0.7)                                         | -0.7 to 2.0    | .366    | 0.7 (0.6)                                               | -0.5 to 2.0   | .241    | -1.3 (0.6)                                    | -2.4 to -0.2   | .022    |
| Maternal IQ         | 0.03 (0.01)                                   | 0.005 to 0.1   | .019    | 0.01 (0.02)                                       | -0.02 to 0.04  | .405    | -0.01 (0.02)                                            | -0.04 to 0.02 | .517    | 0.03 (0.01)                                   | 0.0 to 0.05    | .054    |
| Dose                | -0.008 (0.005)                                | -0.02 to 0.003 | .149    | -0.006 to 0.006                                   | -0.02 to 0.01  | .338    | 0.001 (0.01)                                            | -0.01 to 0.01 | .910    | -0.01 (0.01)                                  | -0.02 to 0.001 | .080    |
| LTG Dose            | 0.009 (0.006)                                 | -0.004 to 0.02 | .162    | 0.01 to 0.008                                     | -0.005 to 0.03 | .181    | -0.002 (0.01)                                           | -0.02 to 0.01 | .757    | 0.01 (0.01)                                   | -0.01 to 0.02  | .481    |
|                     | Fingertip Tapping<br>repetition dominant hand |                |         | Fingertip Tapping<br>repetition non-dominant hand |                |         | Fingertip Tapping<br>series dominant hand               |               |         | Fingertip Tapping<br>series non-dominant hand |                |         |
|                     | B (SE)                                        | 95% CI         | p Value | B (SE)                                            | 95% CI         | p Value | B (SE)                                                  | 95% CI        | p Value | B (SE)                                        | 95% CI         | p Value |
| Constant            | 10.1 (1.1)                                    | 8.0 to 12.2    | .000    | 12.0 (1.0)                                        | 10.1 to 14.0   | .000    | 10.4 (1.4)                                              | 7.7 to 13.2   | .000    | 10.8 (1.5)                                    | 7.7 to 13.8    | .000    |
| VPA                 | 0.1 (0.4)                                     | -0.8 to 0.9    | .909    | 0.1 (0.4)                                         | -0.7 to 1.0    | .748    | -1.5 (0.6)                                              | -2.6 to -0.4  | .011    | -0.9 (0.6)                                    | -2.2 to 0.3    | .153    |
| CBZ                 | 0.7 (0.4)                                     | -0.1 to 1.5    | .082    | 0.1 (0.4)                                         | -0.7 to 0.8    | .792    | -0.1 (0.5)                                              | -1.1 to 0.9   | .869    | 0.3 (0.6)                                     | -0.8 to 1.4    | .559    |
| LEV                 | 0.3 (0.4)                                     | -0.06 to 1.1   | .525    | 0.3 (0.4)                                         | -0.5 to 1.1    | .491    | 0.1 (0.6)                                               | -1.0 to 1.2   | .891    | 0.2 (0.6)                                     | -1.0 to 1.4    | .726    |
| Maternal IQ         | 0.02 (0.01)                                   | -0.002 to 0.04 | .081    | -0.01 (0.01)                                      | -0.2 to 0.01   | .616    | 0.001 (0.01)                                            | -0.02 to 0.03 | .928    | -0.01 (0.01)                                  | -0.04 to 0.01  | .321    |
| Dose                | -0.006 (0.004)                                | -0.01 to 0.002 | .132    | -0.001 (0.004)                                    | -0.01 to 0.01  | .728    | 0.002 (0.01)                                            | -0.01 to 0.01 | .659    | -0.01 (0.01)                                  | -0.02 to 0.01  | .418    |
| LTG Dose            | 0.006 (0.005)                                 | -0.004 to 0.02 | .221    | -0.001 (0.01)                                     | -0.01 to 0.01  | .861    | 0.001 (0.01)                                            | -0.01 to 0.01 | .925    | 0.01 (0.01)                                   | -0.01 to 0.02  | .496    |
| Visuospatial Skills |                                               |                |         |                                                   |                |         |                                                         |               |         |                                               |                |         |
|                     | Arrows                                        |                |         | Design Copying                                    |                |         | Visual Attention                                        |               |         |                                               |                |         |
|                     | B (SE)                                        | 95% CI         | p Value | B (SE)                                            | 95% CI         | p Value | B (SE)                                                  | 95% CI        | p Value |                                               |                |         |
| Constant            | 6.3 (1.9)                                     | 2.5 to 10.0    | .001    | 6.3 (1.2)                                         | 3.9 to 8.8     | .000    | 10.3 (2.2)                                              | 5.8 to 14.7   | .000    |                                               |                |         |
| VPA                 | -1.7 (0.8)                                    | -3.3 to -0.2   | .029    | -1.0 (0.5)                                        | -2.0 to 0.01   | .052    | -0.1 (0.9)                                              | -2.0 to 1.7   | .879    |                                               |                |         |
| CBZ                 | -0.3 (0.7)                                    | -1.7 to 1.0    | .631    | 0.3 (0.5)                                         | -0.6 to 1.2    | .542    | 0.5 (0.8)                                               | -1.1 to 2.2   | .515    |                                               |                |         |
| LEV                 | -0.7 (0.8)                                    | -2.2 to 0.8    | .342    | -0.3 (0.5)                                        | -1.3 to 0.6    | .496    | -0.8 (0.9)                                              | -2.6 to 0.9   | .350    |                                               |                |         |
| Maternal IQ         | 0.1 (0.02)                                    | 0.03 to 0.1    | .001    | 0.03 (0.01)                                       | 0.01 to 0.1    | .015    | 0.01 (0.02)                                             | -0.03 to 0.1  | .669    |                                               |                |         |
| Dose                | -0.001 (0.01)                                 | -0.02 to 0.01  | .857    | -0.01 (0.01)                                      | -0.02 to 0.002 | .113    | -0.01 (0.01)                                            | -0.02 to 0.01 | .421    |                                               |                |         |
| LTG Dose            | -0.01 to 0.01                                 | -0.03 to 0.01  | .419    | 0.01 (0.01)                                       | -0.01 to 0.02  | .295    | 0.01 (0.01)                                             | -0.01 to 0.03 | .468    |                                               |                |         |
